# Supplementary material for: Integrated biorefinery model based on production of furans using open-ended high yield processes
Source: Royal Society of Chemistry journal article supplement (doi:10.1039/c3gc42424c), 2014-01-01
Supplement: c3gc42424c1.pdf [file c3gc42424c1.pdf]

| <b>Date isolated</b> | <b>Ploidy (if known)</b> | <b>Avg Change in Cell Density (final OD595-initial OD595) in YPD+25 mM Furfural</b> | <b>Standard Deviation</b> |
|----------------------|--------------------------|-------------------------------------------------------------------------------------|---------------------------|
| 2007                 | Homozygous Diploid       | 0.6699                                                                              | 0.104636084               |
| 2007                 | Homozygous Diploid       | 0.3151                                                                              | 0.184517425               |
| 2007                 | Homozygous Diploid       | 0.119333333                                                                         | 0.120729629               |
| 2005                 | Homozygous Diploid       | 0.5304                                                                              | 0.121995041               |
| NA                   | Haploid                  | 0.084                                                                               | 0.027365489               |
| NA                   |                          | 0.429866667                                                                         | 0.121267899               |
|                      | Haploid                  | 0.228166667                                                                         | 0.045851536               |
|                      | Haploid                  | 0.047                                                                               | 0.016025293               |
| 1994                 | Diploid                  | 0.110833333                                                                         | 0.042141468               |
| 1996                 | Diploid                  | 0.48                                                                                | 0.020376702               |
| pre-1952             |                          | 0.1925                                                                              | 0.122532649               |
| 2007                 | Homozygous Diploid       | 0.217266667                                                                         | 0.084095204               |
| 2005                 | Homozygous Diploid       | 0.418133333                                                                         | 0.033031248               |
| 2005                 | Homozygous Diploid       | 0.1236                                                                              | 0.074862741               |
| 2005                 | Homozygous Diploid       | 0.4716                                                                              | 0.180850684               |
| 2007                 | Homozygous Diploid       | 0.678833333                                                                         | 0.105480251               |
| 2004                 | Homozygous Diploid       | 0.6701                                                                              | 0.139378478               |
| 2004                 | Homozygous Diploid       | 0.595033333                                                                         | 0.067588041               |
|                      | Haploid                  | 0.606266667                                                                         | 0.08042825                |
| 2003                 | Homozygous Diploid       | 0.094666667                                                                         | 0.083878742               |
| 2007                 | Homozygous Diploid       | 0.055766667                                                                         | 0.006625204               |
| 2005                 | Homozygous Diploid       | 0.1016                                                                              | 0.077415696               |
| 2005                 | Homozygous Diploid       | 0.205033333                                                                         | 0.154686791               |
| 2003                 |                          | 0.593666667                                                                         | 0.052067872               |
| 2007                 | Homozygous Diploid       | 0.025633333                                                                         | 0.012040072               |
| 2007                 | Homozygous Diploid       | 0.628533333                                                                         | 0.019487004               |
| 2002                 |                          | 0.2951                                                                              | 0.206652776               |
| 2007                 | Haploid                  | 0.0847                                                                              | 0.028195212               |
| 2004                 | Homozygous Diploid       | 0.049466667                                                                         | 0.031293663               |
| 2003                 |                          | 0.093433333                                                                         | 0.076598064               |

|                 |                    |             |             |
|-----------------|--------------------|-------------|-------------|
| <b>1987</b>     |                    | 0.091       | 0.084038741 |
| <b>pre-1974</b> |                    | 0.651566667 | 0.104526568 |
| <b>2007</b>     | Homozygous Diploid | 0.1606      | 0.109044578 |
| <b>2007</b>     | Homozygous Diploid | 0.1273      | 0.089765695 |
| <b>2007</b>     | Homozygous Diploid | 0.242566667 | 0.11294146  |
| <b>2007</b>     | Homozygous Diploid | 0.463366667 | 0.156113079 |
| <b>2007</b>     | Homozygous Diploid | 0.695133333 | 0.088573886 |
| <b>2007</b>     | Homozygous Diploid | 0.0975      | 0.011877289 |
|                 |                    | 0.2944      | 0.06816282  |
| <b>2007</b>     | Homozygous Diploid | 0.573733333 | 0.094617669 |
| <b>2004</b>     | Homozygous Diploid | 0.353633333 | 0.122013619 |
| <b>2007</b>     | Homozygous Diploid | 0.4985      | 0.055160856 |
| <b>2007</b>     | Homozygous Diploid | 0.472966667 | 0.194715211 |
| <b>pre-1994</b> |                    | 0.303466667 | 0.115946726 |
| <b>pre-1994</b> |                    | 0.259       | 0.098872241 |
| <b>pre-1994</b> |                    | 0.712266667 | 0.059384033 |
| <b>pre-1994</b> |                    | 0.3692      | 0.035325487 |
| <b>pre-1994</b> |                    | 0.048566667 | 0.039115385 |
|                 |                    | 0.329233333 | 0.127643736 |
| <b>2007</b>     | Homozygous Diploid | 0.0739      | 0.026890333 |
| <b>2007</b>     | Homozygous Diploid | 0.3236      | 0.065782901 |
| <b>2007</b>     | Homozygous Diploid | 0.156866667 | 0.039557595 |
| <b>2004</b>     | Homozygous Diploid | 0.529666667 | 0.152023299 |
| <b>2005</b>     | Homozygous Diploid | 0.308633333 | 0.199127957 |
| <b>2008</b>     | Homozygous Diploid | 0.191533333 | 0.04733987  |
| <b>2007</b>     | Homozygous Diploid | 0.4947      | 0.040754509 |
| <b>2007</b>     | Homozygous Diploid | 0.3298      | 0.148984697 |
